# Supplementary material for: Atomic-scale investigation of cation doping and defect clustering in the anti-perovskite Na3OCl sodium-ion conductor
Source: Royal Society of Chemistry journal article supplement (doi:10.1039/d1ta07588h), 2021-10-22
Supplement: d1ta07588h1.pdf [file d1ta07588h1.pdf]

**Supporting Information:**  
**Atomic-scale investigation of cation doping and  
defect clustering in the anti-perovskite Na<sub>3</sub>OCl  
sodium-ion conductor**

Benedek A. Goldmann<sup>†</sup>, Matt J. Clarke<sup>†</sup>, James A. Dawson<sup>‡</sup>, and  
M. Saiful Islam<sup>\*,†</sup>

<sup>†</sup> *Department of Chemistry, University of Bath, BA2 7AY*

<sup>‡</sup> *Chemistry – School of Natural and Environmental Sciences, Newcastle  
University, Newcastle upon Tyne, NE1 7RU, UK*

E-mail: M.S.Islam@bath.ac.uk

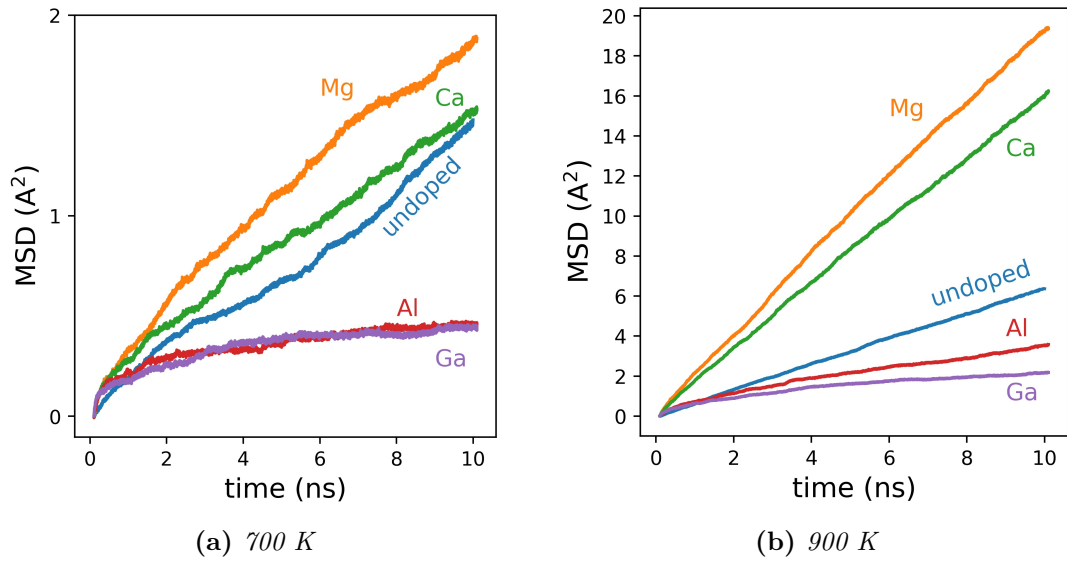

**Figure S1:** Representative examples of mean square displacement data for undoped (0.1% vacancy concentration) and cation doped (1.2% vacancy concentration)  $\text{Na}_3\text{OCl}$  at two temperatures. Note different y-axis scales.

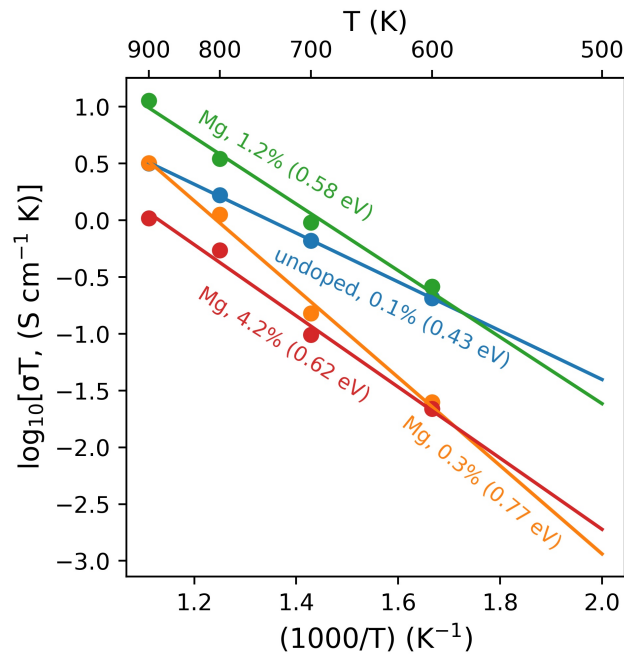

**Figure S2:** Temperature-dependent  $\text{Na}^+$  conductivities ( $\sigma T$ ) for Mg-doped  $\text{Na}_3\text{OCl}$  at three sodium vacancy concentrations compared to the undoped system. 4.2% Mg-doping shows lower ionic conductivity than the 1.2% level.
